# Supplementary material for: Clinical Effects of Oral Bacteriotherapy on Anal HPV Infection and Related Dysplasia in HIV-Positive MSM: Results from the “HPVinHIV” Trial
Source: MDPI journal article supplement (doi:10.3390/biomedicines9111738), 2021-11-22

**Supplementary Materials:**

**Figure S1:** Regression of high-grade lesion (HSIL) in a participant in the experimental arm. **A:** acetic acid appearance of the lesion at T0. **B:** Lugol-iodine appearance of the lesion at T0. **C:** acetic acid appearance of the area at T1. **D:** Lugol-iodine appearance of the area at T1.

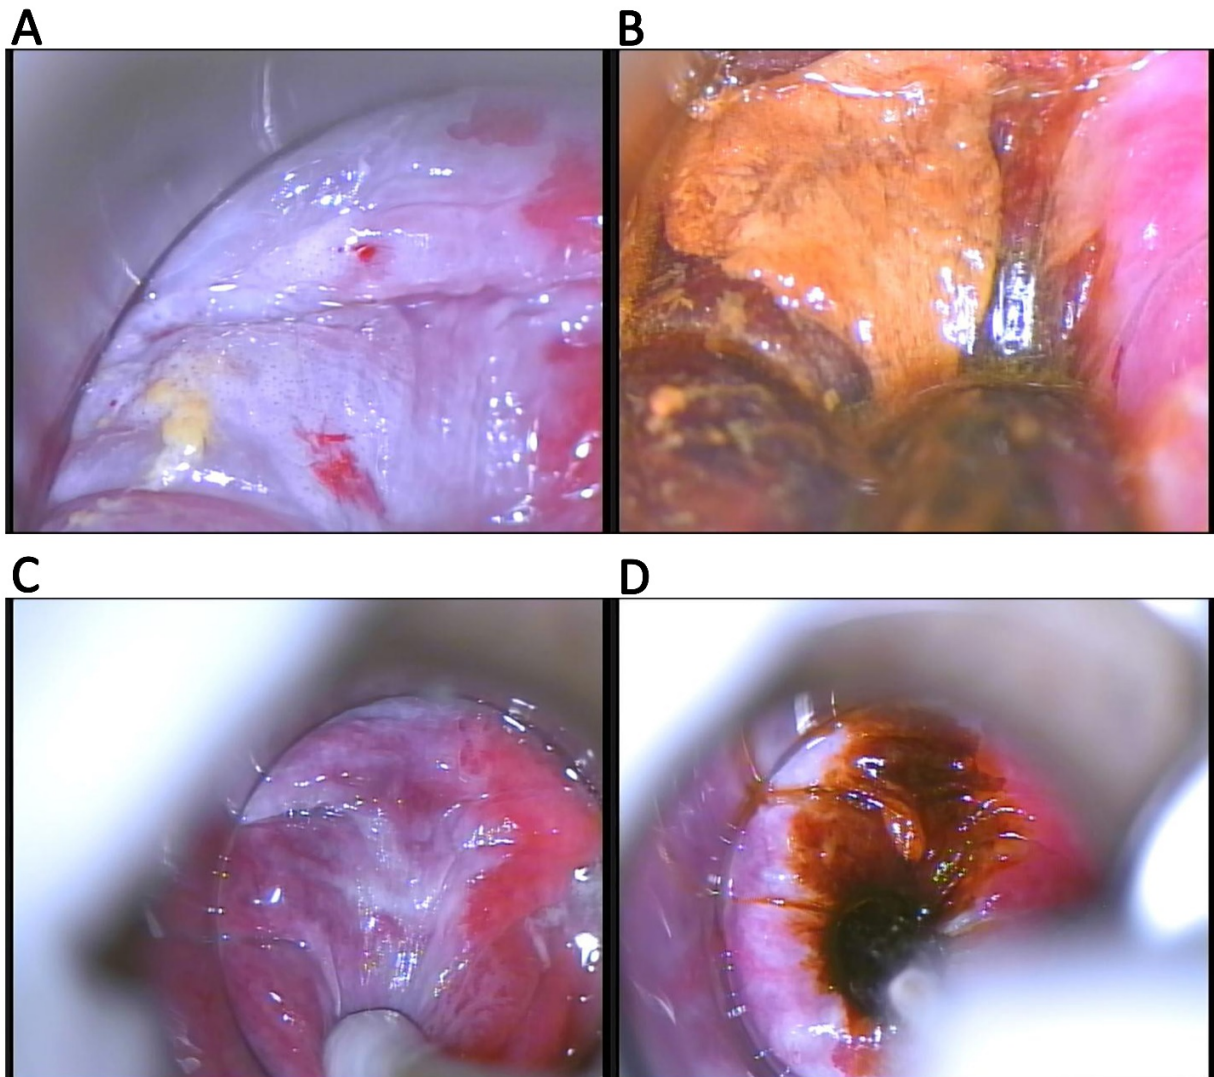

**Figure S2:** Progression of a dysplastic lesion in a participant in the observational arm. **A:** acetic acid appearance of the lesion at T0 (LSIL). **B:** Lugol-iodine appearance of the lesion at T0 (LSIL). **C:** acetic acid appearance of the area at T1 (HSIL). **D:** Lugol-iodine appearance of the area at T1 (HSIL).

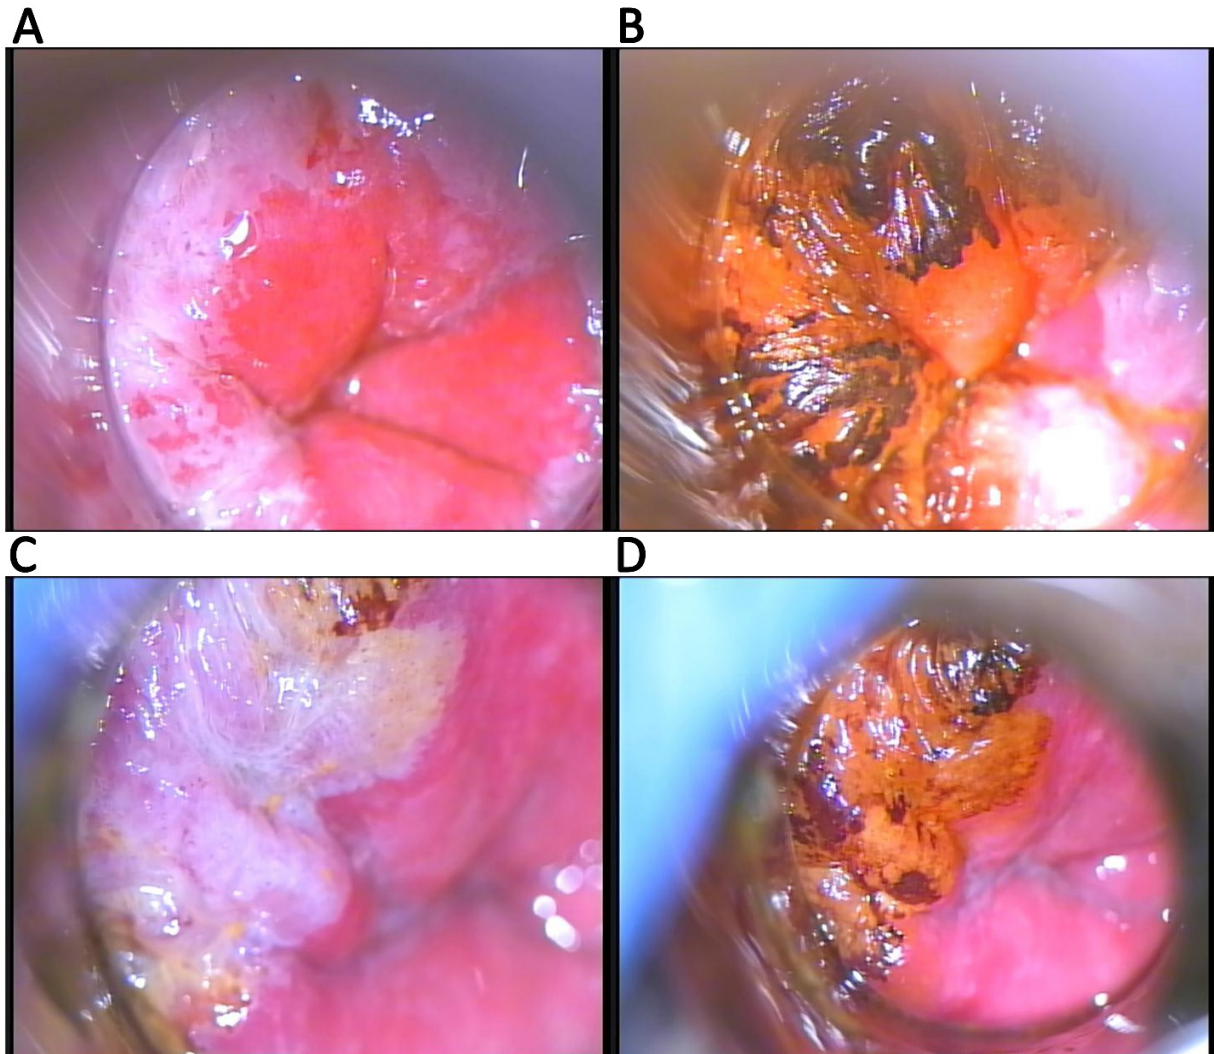

Supplement: s1 [file s1]
